# Supplementary material for: Opsin‐Free Activation of Bmp Receptors by a Femtosecond Laser
Source: PubMed Central journal article supplement (PMC10933676; doi:10.1002/advs.202308072), 2024-01-18
Supplement: ADVS-11-2308072-s001.pdf [file ADVS-11-2308072-s001.pdf]

## Supporting Information

for *Adv. Sci.*, DOI 10.1002/adv.202308072

Opsin-Free Activation of Bmp Receptors by a Femtosecond Laser

*Manjun Xu, Haipeng Wang, Xiaoying Tian, Bingyi Li, Shaoyang Wang, Xiaohui Zhao and Hao He\**

Supplementary Figures

Manjun Xu<sup>1</sup>, Haipeng Wang<sup>1</sup>, Xiaoying Tian<sup>1</sup>, Shaoyang Wang<sup>2</sup>, Bingyi Li<sup>1</sup>, Xiaohui

Zhao<sup>1</sup>, Hao He<sup>1,\*</sup>

<sup>1</sup>School of Biomedical Engineering, Shanghai Jiao Tong University, Shanghai, China

<sup>2</sup>School of Biomedical Engineering, Hainan University, Haikou, China

\*Corresponding author. E-mail: haohe@sjtu.edu.cn

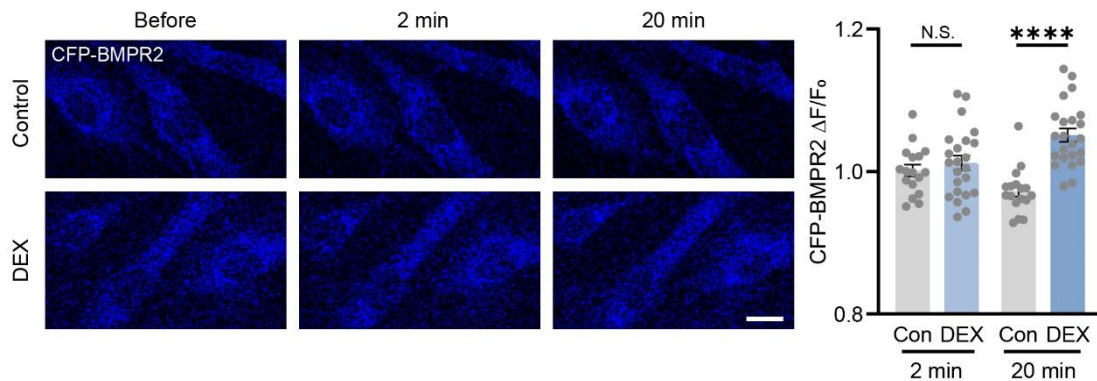

Fig. S1. CFP-BMPR2 and YFP-BMPR1a FRET test indicated by CFP fluorescence after DEX treated (n=23 cells in 3 independent trials). Control: ADSCs without any treatment (n=17 cells in 3 independent trials). Scale bar: 20  $\mu$ m. Right panel: quantified CFP fluorescence after DEX treated. \*\*\*\* $P < 0.0001$  by two-tailed unpaired t test. N.S., no significant difference.

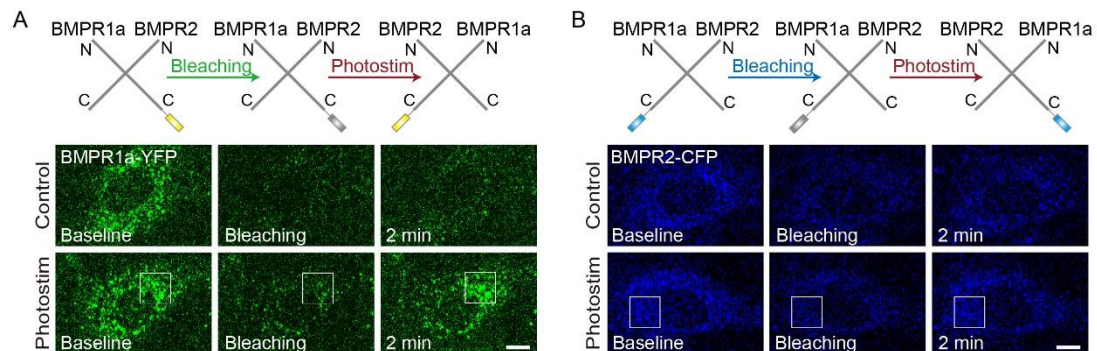

Fig. S2. Pre-bleached BMPR1a-YFP (A) and BMPR2-CFP (B) recovered after photostimulation. Boxes, photostimulation region. Scale bar: 10  $\mu$ m.

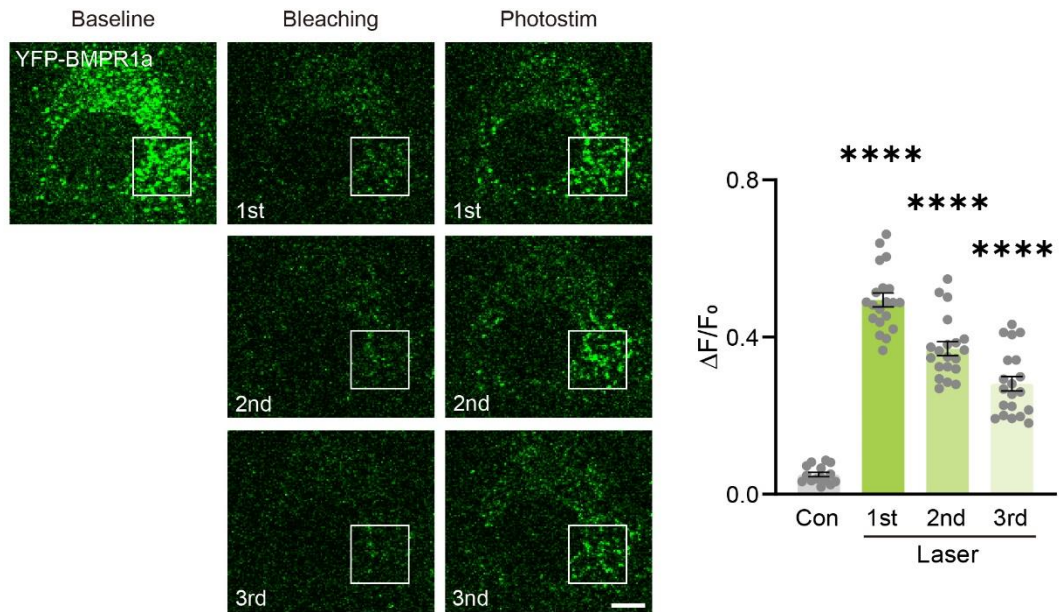

Fig. S3. BMPRIa-YFP recovered after photobleaching and photostimulation (n=20 cells in 3 independent trials) for multi-times. Boxes, photostimulation region. Scale bar: 10  $\mu\text{m}$ . Right panel: quantified recovered ratio of YFP fluorescence. \*\*\*\* $P < 0.0001$  by one-way ANOVA analysis corrected by Dunnet's post-hoc.
